# Supplementary material for: Distinctiveness of genes contributing to growth of Pseudomonas syringae in diverse host plant species
Source: PubMed Central journal article supplement (PMC7521676; doi:10.1371/journal.pone.0239998), 2020-09-28

**S1 Fig**

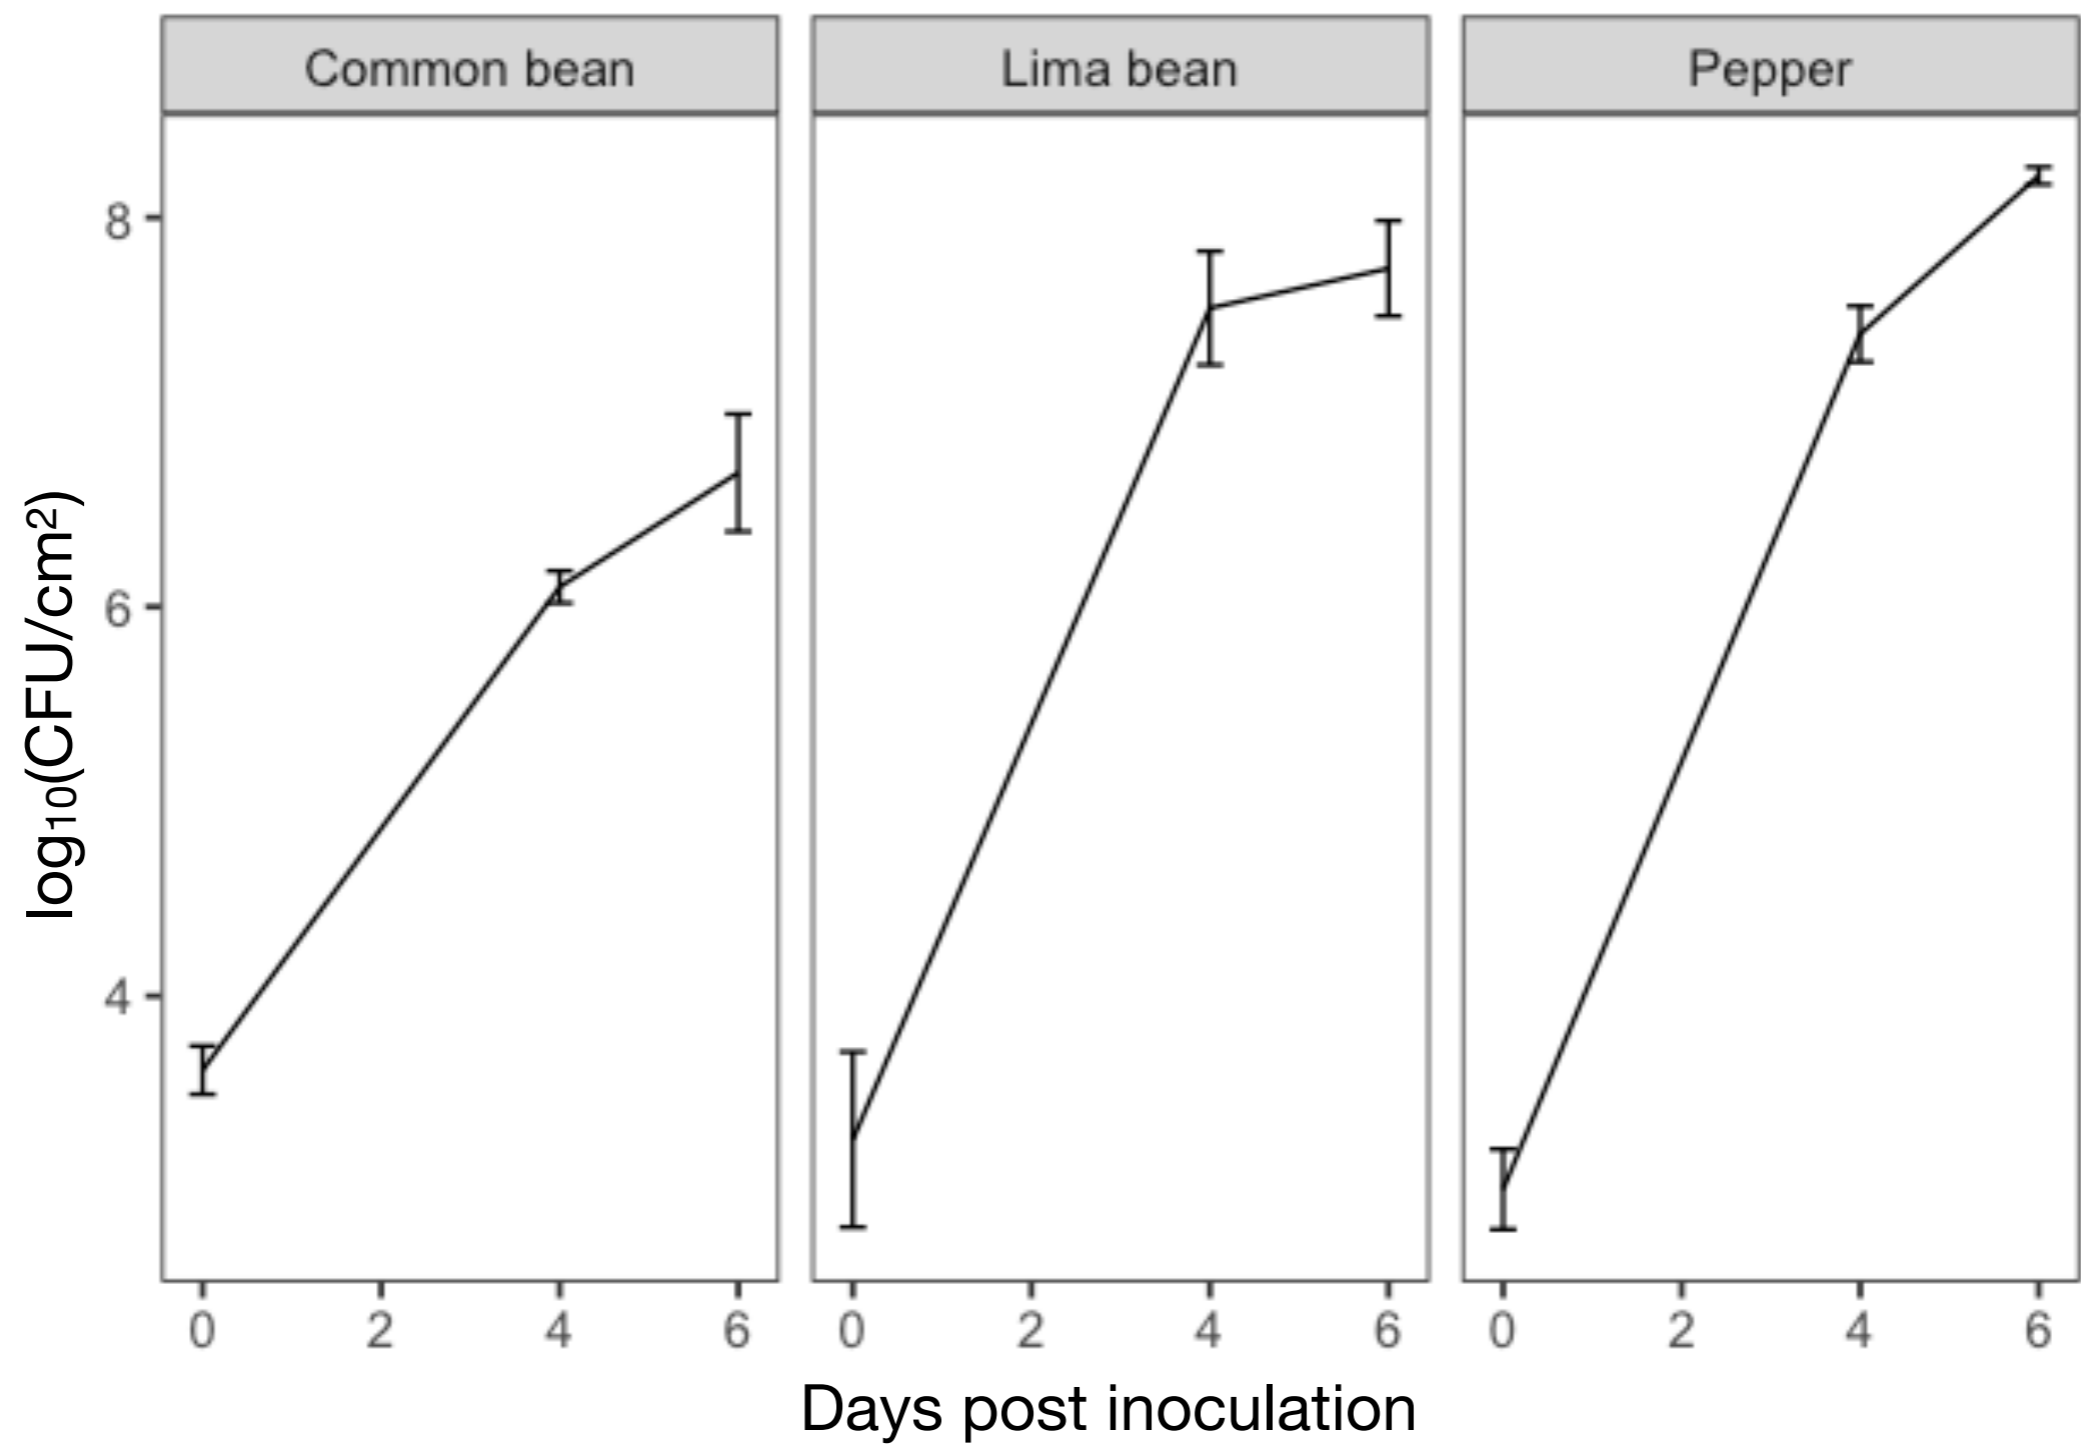

Supplement: pone.0239998.s001.pdf [file pone.0239998.s001.pdf]
